# Supplementary material
Source: PubMed Central journal article supplement (PMC5664198)
Supplement: NIHMS914957-supplement-Appendix_1.pdf [file NIHMS914957-supplement-Appendix_1.pdf]

**Appendix 1.** Characteristics of women from the 2003-2012 National Health and Nutrition Examination Survey by sexual identity and sexual behavior (n=7,132)

|                                    | Sexual Identity                       |                                           |          | Sexual Behavior                            |                                       |                                 | <i>p</i> |
|------------------------------------|---------------------------------------|-------------------------------------------|----------|--------------------------------------------|---------------------------------------|---------------------------------|----------|
|                                    | Heterosexual<br><i>n</i> (weighted %) | Non-heterosexual<br><i>n</i> (weighted %) | <i>p</i> | Opposite-sex only<br><i>n</i> (weighted %) | Any same-sex<br><i>n</i> (weighted %) | No sex<br><i>n</i> (weighted %) |          |
| Survey cycle                       |                                       |                                           | 0.233    |                                            |                                       |                                 | 0.026    |
| 2003-2004                          | 1118 (19.2)                           | 64 (14.5)                                 |          | 1076 (19.6)                                | 62 (12.1)                             | 31 (15.5)                       |          |
| 2005-2006                          | 1284 (20.7)                           | 81 (18.6)                                 |          | 1157 (20.1)                                | 108 (22.5)                            | 80 (26.6)                       |          |
| 2007-2008                          | 1432 (20.8)                           | 121 (21.8)                                |          | 1325 (20.6)                                | 132 (22.2)                            | 70 (22.1)                       |          |
| 2009-2010                          | 1468 (19.3)                           | 136 (21.5)                                |          | 1394 (19.8)                                | 147 (18.9)                            | 57 (15.9)                       |          |
| 2011-2012                          | 1269 (20.0)                           | 131 (23.6)                                |          | 1187 (19.9)                                | 151 (24.3)                            | 55 (19.9)                       |          |
| <i>Demographic characteristics</i> |                                       |                                           |          |                                            |                                       |                                 |          |
| Age (years)                        |                                       |                                           | <0.001   |                                            |                                       |                                 | <0.001   |
| 20-29                              | 1712 (23.0)                           | 199 (37.3)                                |          | 1550 (22.2)                                | 224 (32.9)                            | 123 (48.7)                      |          |
| 30-39                              | 1624 (23.5)                           | 123 (24.6)                                |          | 1542 (23.9)                                | 146 (24.7)                            | 46 (16.4)                       |          |
| 40-49                              | 1749 (28.0)                           | 110 (21.4)                                |          | 1647 (28.3)                                | 133 (23.4)                            | 57 (16.9)                       |          |
| 50-59                              | 1486 (25.4)                           | 101 (16.7)                                |          | 1400 (25.6)                                | 97 (19.1)                             | 67 (17.9)                       |          |
| Race / ethnicity                   |                                       |                                           | 0.009    |                                            |                                       |                                 | <0.001   |
| Non-Hispanic white                 | 2941 (68.6)                           | 205 (60.4)                                |          | 2732 (68.6)                                | 307 (71.0)                            | 77 (47.4)                       |          |
| Non-Hispanic black                 | 1471 (12.4)                           | 128 (15.9)                                |          | 1358 (12.3)                                | 159 (14.7)                            | 69 (16.0)                       |          |
| Hispanic                           | 1735 (13.1)                           | 148 (16.6)                                |          | 1654 (13.4)                                | 95 (8.7)                              | 108 (22.9)                      |          |
| Other                              | 424 (5.9)                             | 52 (7.1)                                  |          | 395 (5.7)                                  | 39 (5.7)                              | 39 (13.7)                       |          |
| Relationship / marital status      |                                       |                                           | <0.001   |                                            |                                       |                                 | <0.001   |
| Not married                        | 2596 (34.9)                           | 295 (56.2)                                |          | 2325 (33.3)                                | 330 (50.0)                            | 208 (79.4)                      |          |
| Married / living with a partner    | 3972 (65.1)                           | 238 (43.8)                                |          | 3811 (66.7)                                | 270 (50.0)                            | 85 (20.6)                       |          |
| Education                          |                                       |                                           | <0.001   |                                            |                                       |                                 | 0.001    |
| Less than a high school degree     | 1354 (13.6)                           | 168 (23.6)                                |          | 1293 (13.8)                                | 110 (14.3)                            | 98 (21.4)                       |          |
| High school degree                 | 1393 (21.2)                           | 122 (21.2)                                |          | 1324 (21.6)                                | 114 (17.2)                            | 59 (20.4)                       |          |

|                                                 |             |            |        |             |            |             |        |
|-------------------------------------------------|-------------|------------|--------|-------------|------------|-------------|--------|
| More than a high school degree                  | 3821 (65.2) | 242 (55.2) |        | 3520 (64.6) | 376 (68.4) | 134 (58.2)  |        |
| Poverty level                                   |             |            | <0.001 |             |            |             | <0.001 |
| Below                                           | 1367 (14.4) | 176 (28.5) |        | 1293 (14.5) | 149 (19.5) | 88 (25.0)   |        |
| At or above                                     | 4826 (85.6) | 322 (71.5) |        | 4500 (85.5) | 428 (80.5) | 176 (75.0)  |        |
| <i>Health-related characteristics</i>           |             |            |        |             |            |             |        |
| Healthcare visit in the last year               |             |            | 0.090  |             |            |             | 0.040  |
| No                                              | 813 (11.3)  | 88 (14.5)  |        | 765 (11.1)  | 73 (11.5)  | 54 (20.3)   |        |
| Yes                                             | 5758 (88.7) | 444 (85.5) |        | 5374 (88.9) | 527 (88.5) | 238 (79.7)  |        |
| Smoking status                                  |             |            | <0.001 |             |            |             | <0.001 |
| Never smoker                                    | 4093 (59.1) | 276 (49.4) |        | 3882 (60.1) | 206 (33.2) | 245 (86.0)  |        |
| Former smoker                                   | 1056 (18.7) | 67 (14.4)  |        | 961 (18.1)  | 132 (25.6) | 16 (5.3)    |        |
| Current smoker                                  | 1420 (22.2) | 190 (36.2) |        | 1294 (21.8) | 262 (41.1) | 32 (8.8)    |        |
| Age at first sexual intercourse                 |             |            | <0.001 |             |            |             | --     |
| 15 or younger                                   | 1607 (23.1) | 198 (37.2) |        | 1487 (22.5) | 296 (48.1) | 0 (0.0)     |        |
| 16 or older                                     | 4940 (76.9) | 332 (62.8) |        | 4646 (77.5) | 304 (51.9) | 293 (100.0) |        |
| Total number of sexual partners during lifetime |             |            | <0.001 |             |            |             | --     |
| 4 or fewer                                      | 3275 (48.2) | 182 (24.8) |        | 3134 (48.7) | 42 (5.6)   | 293 (100.0) |        |
| 5 or more                                       | 3214 (51.8) | 344 (75.2) |        | 3005 (51.3) | 558 (94.4) | 0 (0.0)     |        |

*Note.* Table reports raw frequencies and weighted percentages. Totals may not sum to stated sample size due to missing data. Percents may not sum to 100% due to rounding. Chi-square tests were used to compare groups and produce the reported *p*-values. Dashes (--) indicate that a *p*-value could not be calculated.
